# Supplementary material for: Controllable CVD route to CoS and MnS single-crystal nanowiresElectronic supplementary information (ESI) available: morphology of as-prepared MnS nanowires. See http://www.rsc.org/suppdata/cc/b3/b307452h/
Source: Royal Society of Chemistry journal article supplement (doi:10.1039/b307452h), 2003-01-01
Supplement: b307452h.doc [file b307452h.doc]

| 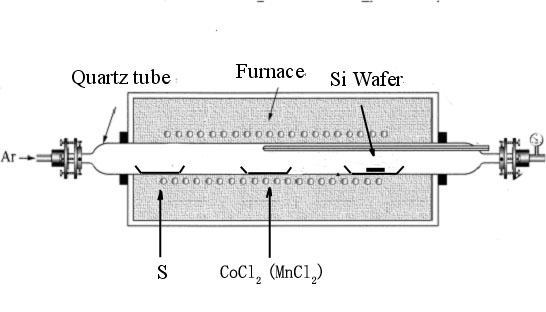 |
| --- |
| Apparatus for the synthesis of CoS and MnS nanowires. |
|  |
| 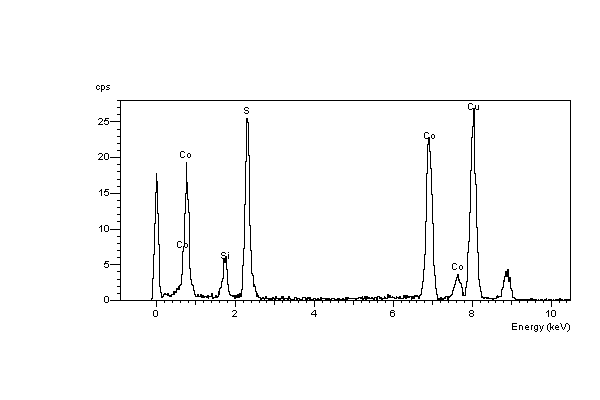 |
| EDAX spectra for the as-prepared CoS nanowire. |

| 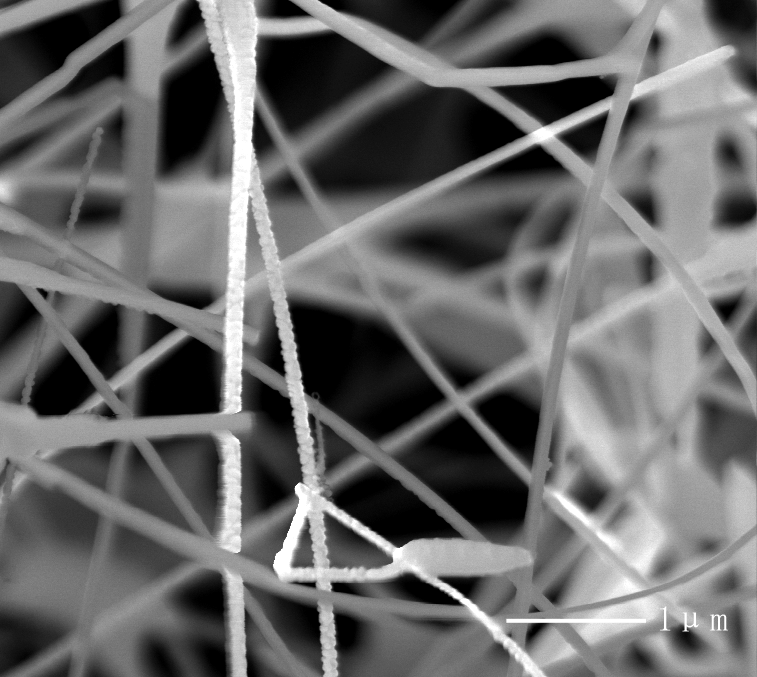 |
| --- |
| SEM images of the MnS nanowires |

| 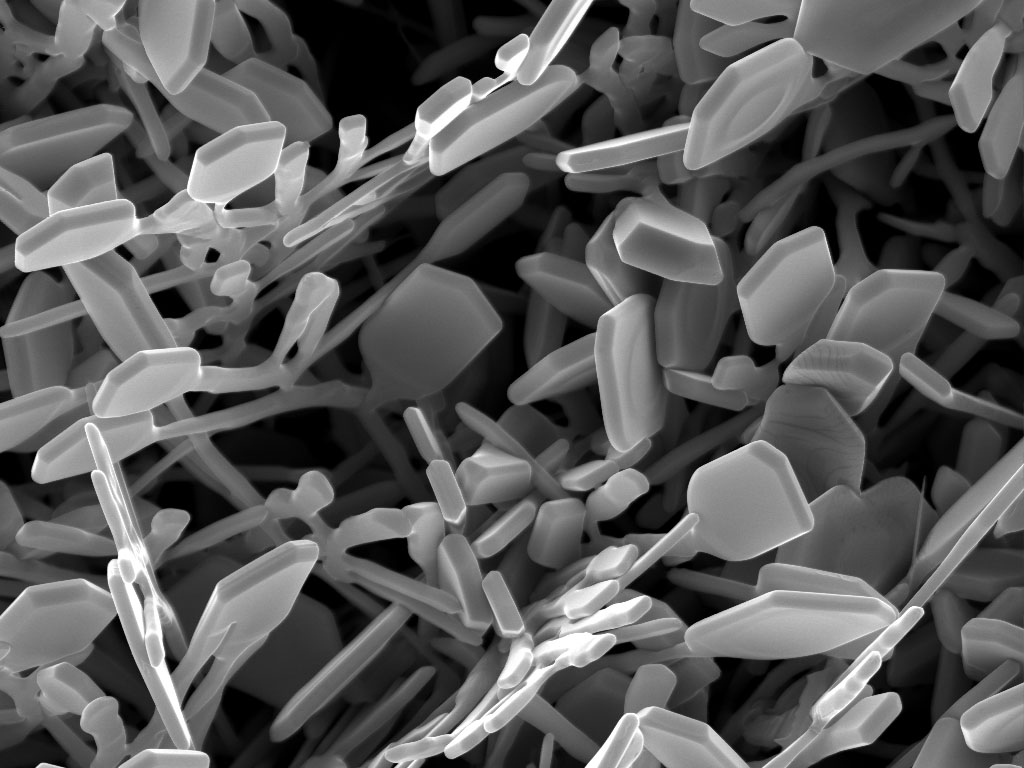 |
| --- |
| CoS plates deposited on substrate at 950 °C |
